# Supplementary material for: Alkaloids from the Sponge Stylissa carteri Present Prospective Scaffolds for the Inhibition of Human Immunodeficiency Virus 1 (HIV-1)
Source: PubMed Central journal article supplement (PMC4771981; doi:10.3390/md14020028), 2016-02-04
Supplement: marinedrugs-14-00028-s001.pdf [file marinedrugs-14-00028-s001.pdf]

# Supplementary Materials: Alkaloids from the Sponge *Stylissa carteri* Present Prospective Scaffolds for the Inhibition of Human Immunodeficiency Virus 1 (HIV-1)

Aubrie O'Rourke, Stephan Kremb, Theresa Maria Bader, Markus Helfer, Philippe Schmitt-Kopplin, William H. Gerwick, Ruth Brack-Werner and Christian R. Voolstra

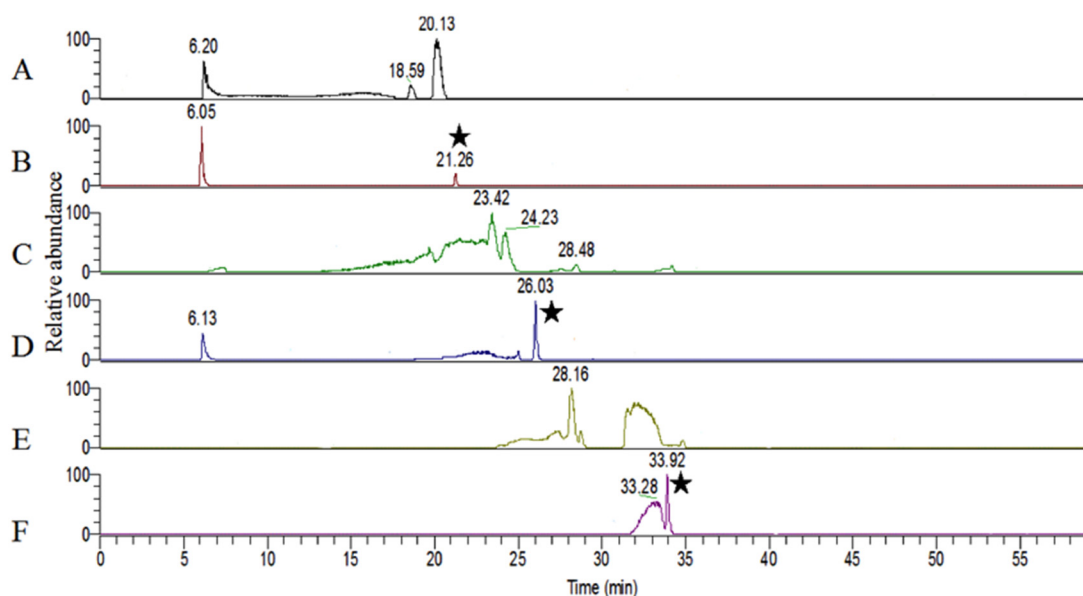

**Figure S1.** LC-MS chromatograms (extracted ion chromatograms) of the  $m/z$  ions associated with debromohymenialdisine, hymenialdisine, and oroidin for SPE fraction 1 from *S. carteri* and comparison to the purchased standards. (A) retention time for debromohymenialdisine in the SPE fraction 1 of *S. carteri*; (B) retention time for the debromohymenialdisine standard (starred); (C) retention time for hymenialdisine in the SPE fraction 1 of *S. carteri*; (D) retention time for the hymenialdisine standard (starred); (E) retention time for oroidin in the SPE fraction 1 of *S. carteri*; (F) retention time for the oroidin standard (starred).

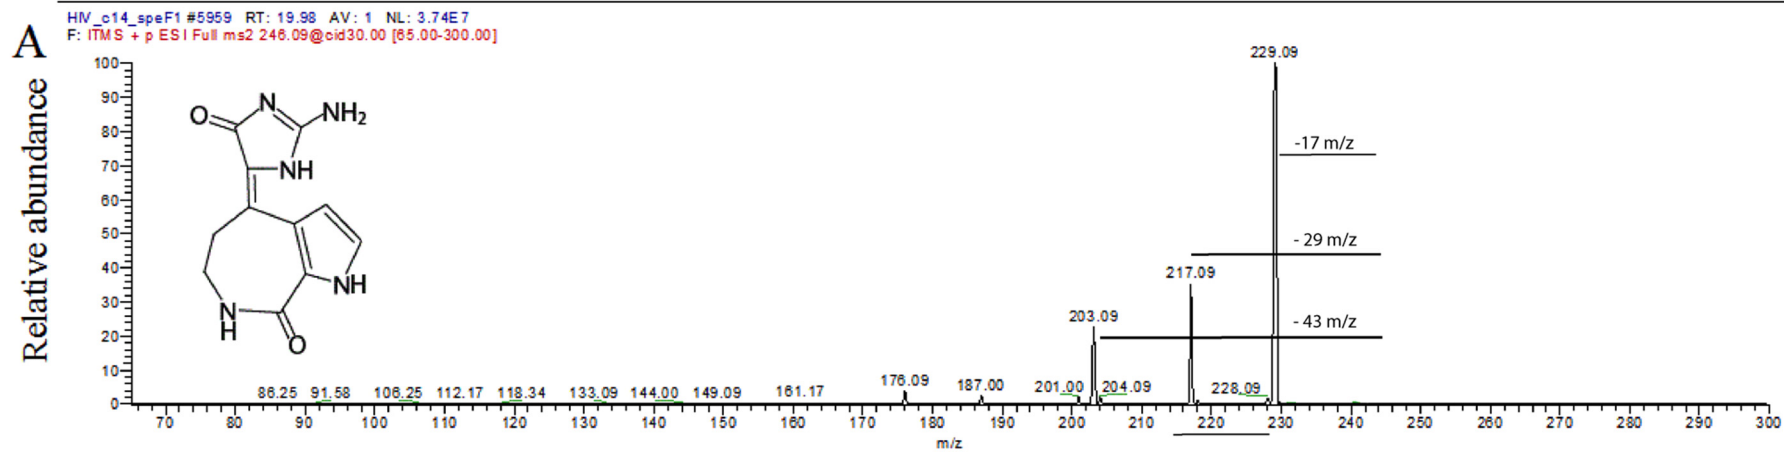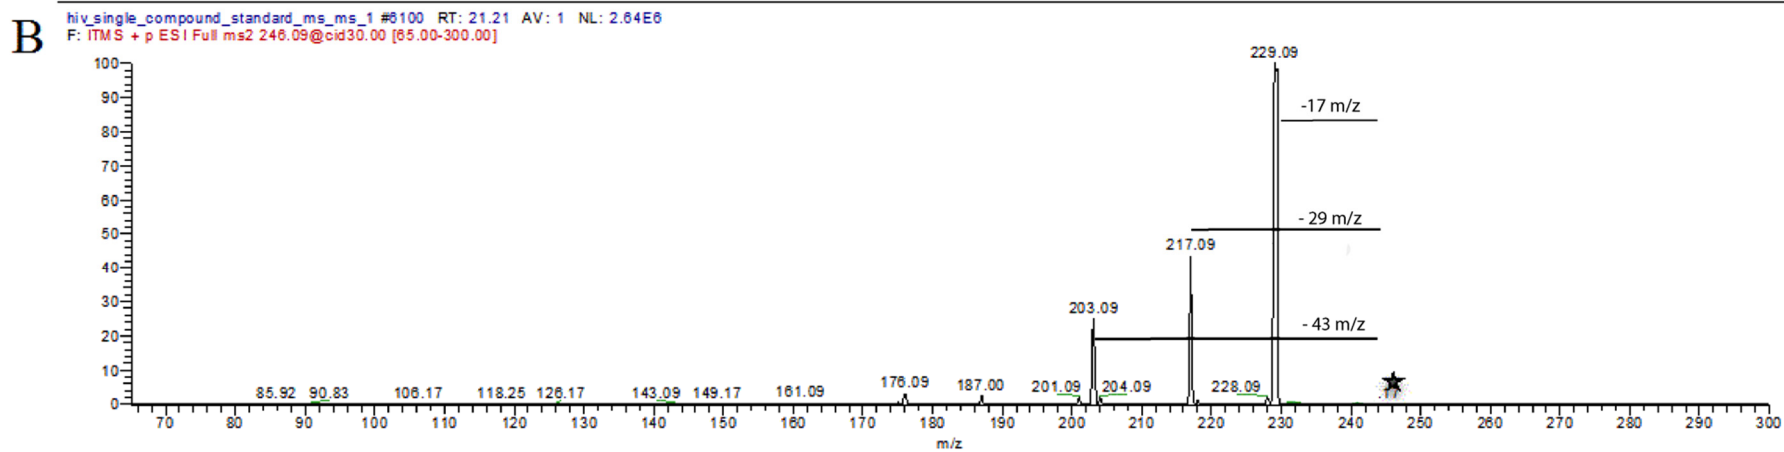

Figure S2. Cont.

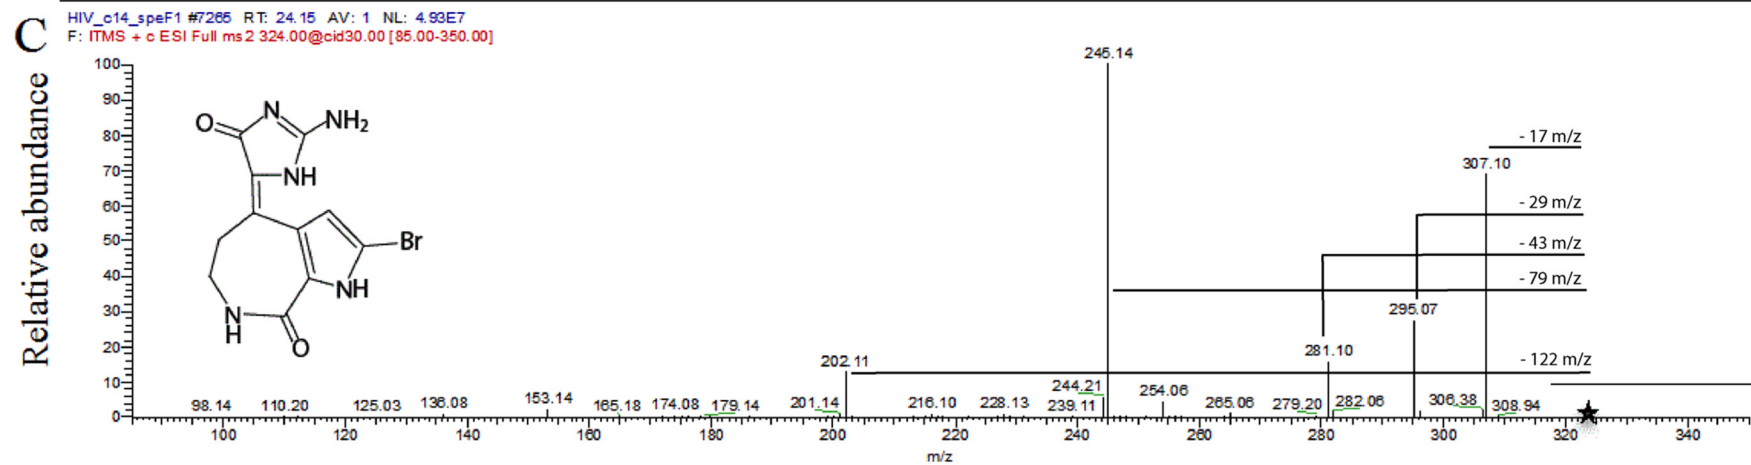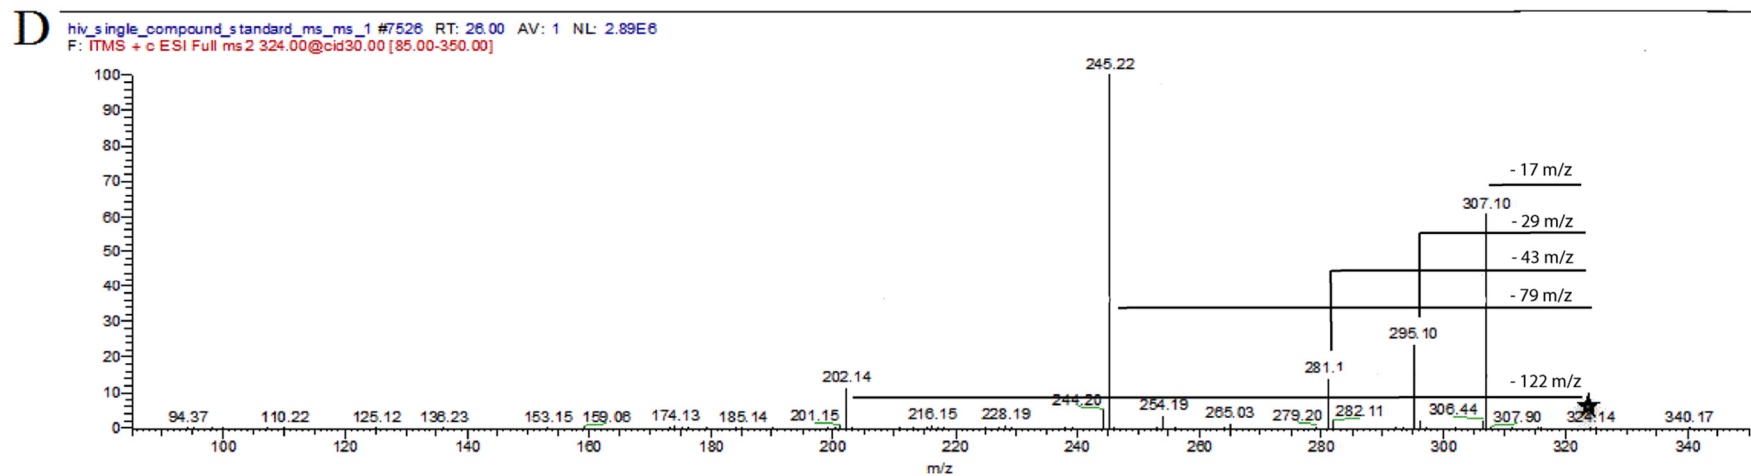

Figure S2. Cont.

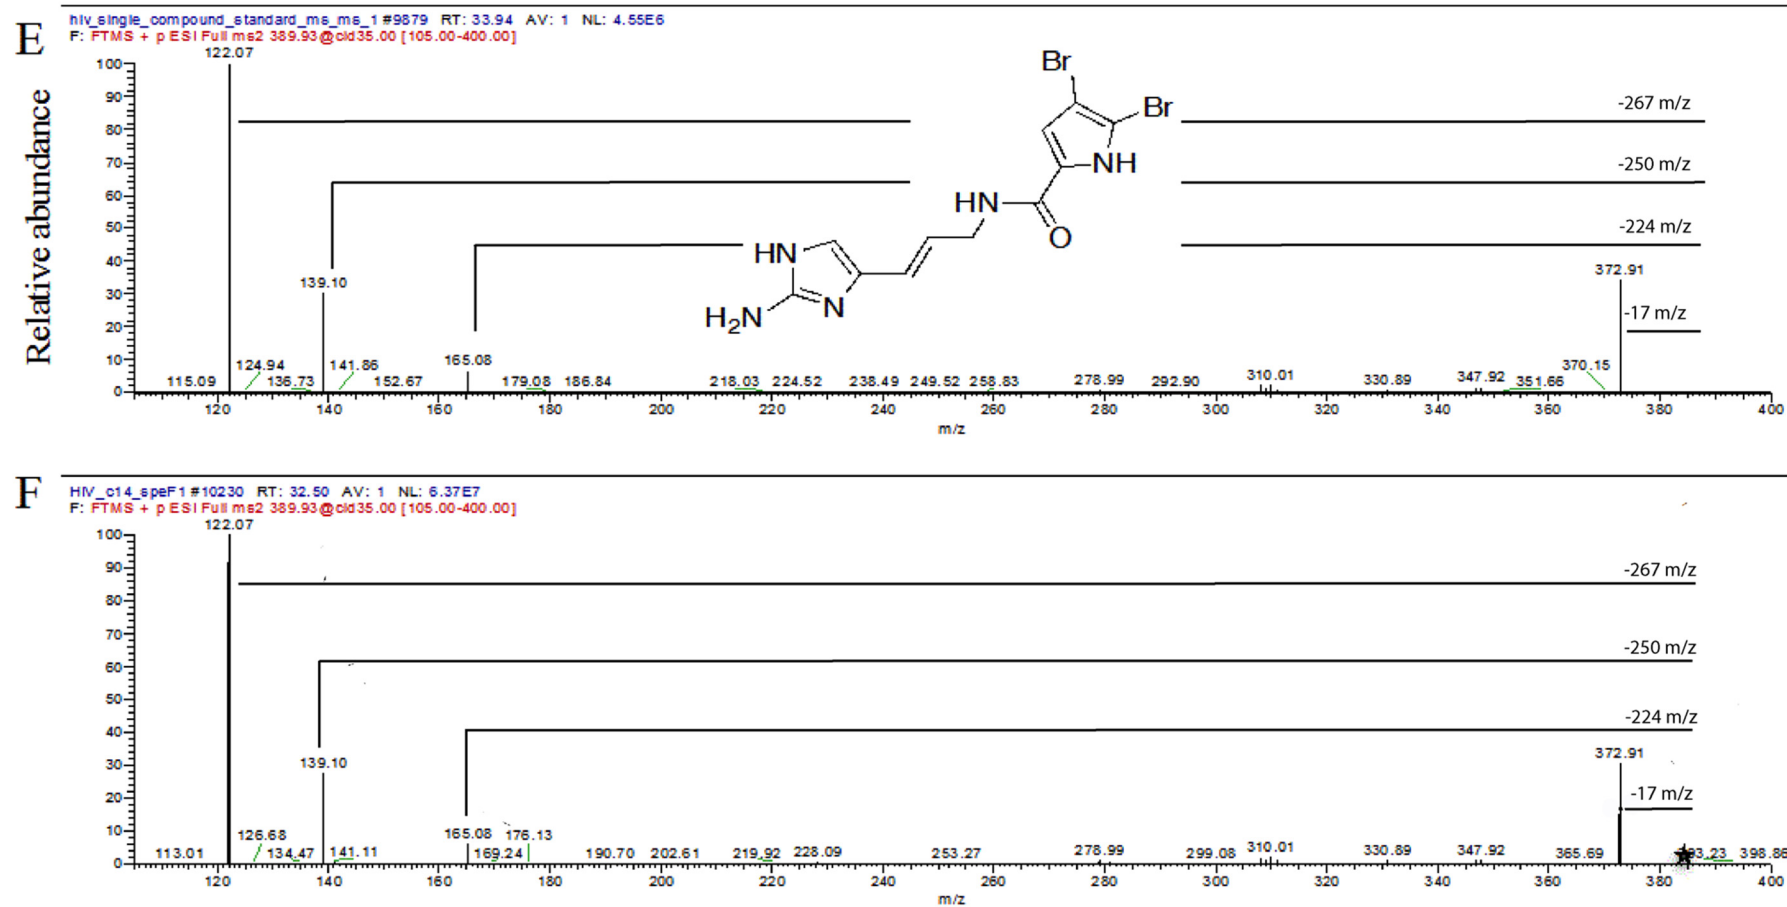

**Figure S2.** MS/MS fragmentation pattern for debromohymenialdisine, hymenialdisine, and oroidin using a collision-induced dissociation of 30 eV. (A) Fragmentation pattern of debromohymenialdisine in the SPE fraction 1 of *S. carteri*; (B) Fragmentation pattern of the debromohymenialdisine standard; (C) Fragmentation pattern of hymenialdisine in the SPE fraction 1 of *S. carteri*; (D) Fragmentation pattern of the hymenialdisine standard; (E) Fragmentation pattern of oroidin in the SPE fraction 1 of *S. carteri*; (F) Fragmentation pattern of the oroidin standard.

## Debromohymenialdisine

### Product Specifications

|                    |                                                                                            |
|--------------------|--------------------------------------------------------------------------------------------|
| Alternative Name:  | DBH, 4-(2-Amino-4-oxo-2-imidazolin-5-ylidene)-4,5,6,7-tetrahydropyrrolo[2,3-c]azepin-8-one |
| IDENTITY:          | Identity determined by <sup>1</sup> H-NMR and MS.                                          |
| FORMULA:           | C <sub>11</sub> H <sub>11</sub> N <sub>5</sub> O <sub>2</sub>                              |
| MW:                | 245.2                                                                                      |
| PURITY:            | ≥95% (HPLC)                                                                                |
| APPEARANCE:        | Yellow solid.                                                                              |
| CAS:               | 75593-17-8, 125118-55-0                                                                    |
| SOURCE/HOST:       | Isolated from sponge <i>Axinella carteri</i> .                                             |
| SOLUBILITY:        | Soluble in 100% ethanol or DMSO.                                                           |
| LONG TERM STORAGE: | -20°C                                                                                      |
| HANDLING:          | Keep under inert gas.<br>Protect from light.                                               |

## Hymenialdisine

### Product Specifications

|                    |                                                                 |
|--------------------|-----------------------------------------------------------------|
| IDENTITY:          | Identity determined by <sup>1</sup> H- NMR and MS.              |
| FORMULA:           | C <sub>11</sub> H <sub>10</sub> BrN <sub>5</sub> O <sub>2</sub> |
| MW:                | 324.1                                                           |
| PURITY:            | ≥97% (HPLC)                                                     |
| APPEARANCE:        | Yellow oil.                                                     |
| CAS:               | 82005-12-7                                                      |
| SOURCE/HOST:       | Isolated from sponge <i>Axinella carteri</i> .                  |
| SOLUBILITY:        | Soluble in DMSO (5mg/ml).                                       |
| SHIPPING:          | AMBIENT                                                         |
| LONG TERM STORAGE: | -20°C                                                           |
| HAZARD:            | TOXIC.                                                          |
| HANDLING:          | Protect from light.                                             |

## Oroidin

### Product Specifications

|                    |                                                                        |
|--------------------|------------------------------------------------------------------------|
| FORMULA:           | C <sub>11</sub> H <sub>11</sub> Br <sub>2</sub> N <sub>5</sub> O       |
| MW:                | 389.1                                                                  |
| CAS NUMBER:        | 34649-22-4                                                             |
| SOURCE/HOST:       | Isolated from <i>Stylissa</i> sp.                                      |
| PURITY:            | ≥97% (HPLC, NMR)                                                       |
| IDENTITY:          | Identity determined by <sup>1</sup> H-NMR, <sup>13</sup> C-NMR and MS. |
| APPEARANCE:        | Amorphous solid. (Actual lot: beige solid)                             |
| SOLUBILITY:        | Soluble in 100% ethanol or DMSO.                                       |
| SHIPPING:          | AMBIENT                                                                |
| LONG TERM STORAGE: | -20°C                                                                  |
| HANDLING:          | Protect from light. Keep cool and dry.                                 |

**Figure S3.** Enzo Life Sciences quality control reports for the procured debromohymenialdisine (Lot: L20314), hymenialdisine (Lot: L27315), and oroidin (Lot: L26427).

**Table S1.** HPLC gradient used to separate the *S. carteri* SPE fraction 1 into HPLC fractions 1–11.

| <b>Time</b> | <b>% H<sub>2</sub>O</b> | <b>% Acetonitrile</b> |
|-------------|-------------------------|-----------------------|
| 0 min       | 65                      | 35                    |
| 1 min       | 65                      | 35                    |
| 20 min      | 30                      | 70                    |
| 26 min      | 30                      | 70                    |
| 28 min      | 65                      | 35                    |
| 30 min      | 65                      | 35                    |

**Table S2.** LC-MS gradient used to characterize the bioactive compounds of *S. carteri* SPE fraction 1, HPLC fraction 2 and 6.

| <b>Time</b> | <b>% H<sub>2</sub>O</b> | <b>% MeOH</b> | <b>Formic Acid in Each Solvent</b> |
|-------------|-------------------------|---------------|------------------------------------|
| 0 min       | 90                      | 10            | 0.10%                              |
| 5 min       | 90                      | 10            | 0.10%                              |
| 40 min      | 10                      | 90            | 0.10%                              |
| 50min       | 10                      | 90            | 0.10%                              |
| 55min       | 90                      | 10            | 0.10%                              |
| 60min       | 90                      | 10            | 0.10%                              |
